# Supplementary material for: EjNAC3 transcriptionally regulates chilling-induced lignification of loquat fruit via physical interaction with an atypical CAD-like gene
Source: PubMed Central journal article supplement (PMC5853329; doi:10.1093/jxb/erx330), 2017-09-16

**Fig. S1** Localization of EjNAC3. Vector contain mCherry (35S::mCherry) was used indicating location of nucleus. EjNAC3 fused with GFP was detected only in the nucleus.

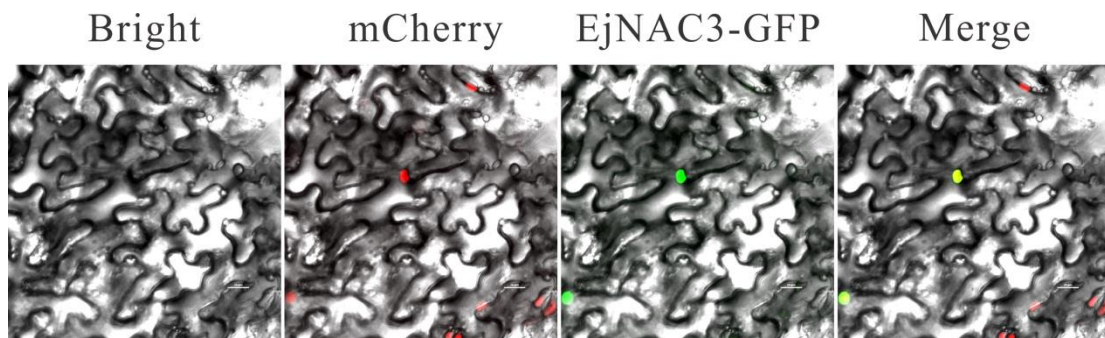

Supplement: erx330_suppl_supplementary_figure_s1.pdf [file erx330_suppl_supplementary_figure_s1.pdf]
