# Supplementary material for: EjNAC3 transcriptionally regulates chilling-induced lignification of loquat fruit via physical interaction with an atypical CAD-like gene
Source: PubMed Central journal article supplement (PMC5853329; doi:10.1093/jxb/erx330), 2017-09-16
Supplement: erx330_suppl_supplementary_table_s1_s5.pdf [file erx330_suppl_supplementary_table_s1_s5.pdf]

## Appendix

**Table S1 Primers for RACE**

| Gene          |       | Primary primer (5' to 3') | Nested primer (5' to 3')  |
|---------------|-------|---------------------------|---------------------------|
| <i>EjNAC3</i> | 5RACE | TGCCCGGTTTGTTCAGACCAGT    | CAAGGCAAATCCCAAGGCTCACAC  |
|               | 3RACE | CTTCCTCCGGGATTCCGATTCATC  | AGTGTGAGCCTTGGGATTGCCTTG  |
| <i>EjNAC4</i> | 5RACE | ACGAAGACCCGTCACCTTGGACAAC | GACCTTTGAGACCACCAGCTCACCA |
|               | 3RACE | CATGCACCAATACCACCTTGGCAAC | GGGCGACAATAGAGAAAGCCACCT  |

**Table S2 Primers for Realtime PCR**

| Gene          | Forward Primer (5' to 3') | Reverse Primer (5' to 3') |
|---------------|---------------------------|---------------------------|
| <i>EjNAC3</i> | GTACTCGTCCGCTCCGATAG      | GCACTCCCTTGGTTCTTCAA      |
| <i>EjNAC4</i> | TGTGAATATAAGAGGTGGGCAAG   | GAAAGGACCTCCAGGATCATAGT   |

**Table S3 Primers for full length sequences of *EjNAC* genes isolation**

| Gene          | Forward Primer (5' to 3') | Reverse Primer (5' to 3') |
|---------------|---------------------------|---------------------------|
| <i>EjNAC3</i> | ATGGAAAATACTTCAGGGTTTA    | TCAATAATTCCAGAGGCCATCGA   |
| <i>EjNAC4</i> | ATGACATGGTGCAATGACTCCGA   | CTATTCCTCTCAAGCTTCCCTT    |

**Table S4** Primers for pGADT-7 vector construction

---

| <b>Gene</b>   | <b>Forward Primer (5' to 3')</b> | <b>Reverse Primer (5' to 3')</b> |
|---------------|----------------------------------|----------------------------------|
| <i>EjNAC3</i> | GAATTCATGGAAAATACTTCAGGGTT       | GGATCCTCAATAATTCCAGAGGCCA        |

---

**Table S5** Probes used for EMSA assay

---

|                     |                                                   |
|---------------------|---------------------------------------------------|
| <b>Biotinylated</b> | GTCCTATACGTAATCTTATACTCCAATAAAAATTAGGAATGCAGCATAA |
| <b>wild probe F</b> |                                                   |
| <b>Biotinylated</b> | TTATGCTGCATTCCTAATTTTATTTGGAGTATAAGATTACGTATAGGAC |
| <b>wild probe R</b> |                                                   |

---
